## LABORATORY INVESTIGATIONS

Anesthesiology

82:102-107, 1995

© 1995 American Society of Anesthesiologists, Inc.

J. B. Lippincott Company, Philadelphia

# Carbachol, Norepinephrine, and Hypocapnia Stimulate Phosphatidylinositol Turnover in Rat Tracheal Slices

Osamu Shibata, M.D.,\* Tetsuji Makita, M.D.,† Toshiya Tsujita, M.D.,‡ Shiro Tomiyasu, M.D.,† Toru Fujigaki, M.D.,‡ Harumasa Nakamura, M.D.,‡ Koji Sumikawa, M.D.§

**Background:** The intracellular mechanisms involved in the  $\alpha$ -adrenoceptor- or hyperventilation-induced bronchoconstriction remain unknown. Because there is a direct relationship between phosphatidylinositol (PI) metabolism and airway smooth muscle contraction induced by muscarinic agonists, the authors examined the effects of carbachol (CCh), norepinephrine (NE), and hypocapnia on PI turnover in the airway smooth muscle.

**Methods:** Rat tracheal slices were incubated in Krebs-Henseleit solution containing LiCl and [ $^3$ H]myo-inositol in the presence of NE, CCh, or neither. The  $P_{CO_2}$  in the solution was  $36 \pm 3$  mmHg (normocapnia),  $19 \pm 2$  mmHg (moderate hypocapnia), or  $5 \pm 2$  mmHg (severe hypocapnia), respectively. [ $^3$ H]inositol monophosphate (IP<sub>1</sub>) formed was counted with a liquid scintillation counter.

**Results:** Basal IP<sub>1</sub> formed was greater at severe hypocapnia than at normocapnia. Norepinephrine- and CCh-induced IP<sub>1</sub> formation were also greater at hypocapnia than at normocapnia.

**Conclusions:** These results indicate that CCh, NE, and hypocapnia stimulate PI turnover in the airway smooth muscle, which would cause bronchoconstriction, and hypocapnia also augments NE- and CCh-induced PI turnover, which could cause worsening of exercise-induced asthma and vagotonic asthma, respectively. (Key words: Lungs, hyperventilation: hypocapnia. Phosphatidylinositol turnover: inositol monophosphate. Sympathetic nervous system, catecholamines: norepinephrine.)

BOTH muscarinic receptors and  $\alpha$ -adrenoceptors have been shown to exist in airway smooth muscle.<sup>1</sup> Baron

*et al.*<sup>2</sup> reported that phosphatidylinositol (PI) metabolism plays a role in the pharmacomechanical coupling of muscarinic receptor-mediated airway smooth muscle contraction. Hashimoto *et al.* demonstrated that inositol 1,4,5-triphosphate (IP<sub>3</sub>) may initiate smooth muscle contraction in dogs.<sup>3</sup> Meurs *et al.*<sup>4</sup> demonstrated evidence for a direct relationship between PI metabolism and airway smooth muscle contraction induced by muscarinic agonists. On the other hand, some studies have reported that  $\alpha$ -adrenoceptor agonists stimulate human airway smooth muscle contraction,<sup>5-7</sup> that  $\alpha$ -adrenoceptors play a role in exercise-induced bronchoconstriction,<sup>8</sup> and that plasma norepinephrine (NE) increases in normal and asthmatic subjects during exercise.<sup>9</sup> However, the intracellular mechanisms involved in the  $\alpha$ -adrenoceptor-induced bronchoconstriction remain unknown.

It is known that hyperventilation<sup>10-13</sup> provokes bronchoconstriction and worsens exercise-induced asthma. Several investigators reported that bronchoconstriction occurs in asthmatic patients during exercise more readily when they breathe cold dry air than when they breathe warm moist air, and suggested that either heat loss or water loss worsened exercise-induced asthma.<sup>14-18</sup> Thus, Freed *et al.*<sup>19</sup> speculated that drying of the bronchial mucosa may inactivate an epithelial-dependent relaxant process and simultaneously stimulate release of bronchoactive mediators from osmosensitive cells, and that cooling *per se* would tend to offset the effect of hyperventilation to provoke bronchoconstriction. On the other hand, hyperventilation could not induce airway obstruction when end-tidal CO<sub>2</sub> was maintained at a normal resting level.<sup>11</sup> Thus, it seems probable that hypocapnia plays an essential role in the genesis of hyperventilation-induced bronchoconstriction.<sup>10-13</sup>

Although both NE and hypocapnia seem to play essential roles in exercise-induced asthma, the mecha-

\* Associate Professor.

† Staff Anesthesiologist.

‡ Assistant Professor.

§ Professor.

Received from the Department of Anesthesiology, Nagasaki University School of Medicine, Nagasaki, Japan. Submitted for publication February 7, 1994. Accepted for publication August 8, 1994. Presented in part at the annual meeting of the American Society of Anesthesiologists, New Orleans, Louisiana, October 17-21, 1992.

Address reprint requests to Dr. Shibata: Department of Anesthesiology, Nagasaki University School of Medicine, 1-7-1 Sakamoto, Nagasaki 852, Japan.



## NE AND HYPOCAPNIA STIMULATE PI TURNOVER

nisms remain unknown. The current study was designed using rat tracheal slices to clarify whether NE or hypocapnia could stimulate PI turnover, which is an important physiologic step in the bronchoconstriction process.

### Materials and Methods

The technique of Brown *et al.*<sup>20</sup> was used. Inositol 1,4,5-triphosphate is rapidly degraded into inositol monophosphate (IP<sub>1</sub>), which is recycled back to phosphatidylinositol (PI) *via* free inositol. Li<sup>+</sup> inhibits the conversion of IP<sub>1</sub> into inositol. Thus, in the presence of Li<sup>+</sup>, the accumulation rate of IP<sub>1</sub> reflects the extent of PI turnover.<sup>21</sup> We measured [<sup>3</sup>H]IP<sub>1</sub> in tracheal slices incubated with [<sup>3</sup>H]myo-inositol (Amersham, Tokyo, Japan). The studies were conducted under guidelines approved by the Animal Care Committee of Nagasaki University School of Medicine. Ninety-four male Wistar rats (Charles River, Yokohama, Japan) weighing 250–350 g were used for experiments. The rats were stunned by cervical dislocation and decapitated, and the tracheas were rapidly isolated. For tissue preparation without epithelium, epithelium was removed by rubbing with cotton gauze. Trachea with or without epithelium was cut longitudinally and chopped into 1-mm-wide pieces with a McIlwain tissue chopper (The Mickle Laboratory Engineering, Gomshall, England). Briefly, three pieces of the tracheal slice were placed in small flat-bottomed tubes and preincubated for 15 min in Krebs-Henseleit (K-H) solution (composition in mM: NaCl 118, KCl 4.7, CaCl<sub>2</sub> 1.3, KH<sub>2</sub>PO<sub>4</sub> 1.2, MgSO<sub>4</sub> 1.2, NaHCO<sub>3</sub> 25, glucose 10, and Na<sub>2</sub>-EDTA 0.05) containing 5 mM LiCl. The solution was continuously aerated with 95% O<sub>2</sub>/5% CO<sub>2</sub>. An aliquot of 0.5  $\mu$ Ci [<sup>3</sup>H]myo-inositol was then added to each tube (final concentration 0.1  $\mu$ M in 300  $\mu$ l incubation volume) and the tubes were flushed with 95% O<sub>2</sub>/5% CO<sub>2</sub>, capped, set in a shaking bath at 37°C, and incubated for 30 min (time 0).

#### Effects of Norepinephrine and Carbachol on IP<sub>1</sub> Formation

The reaction was started at time 0 when NE, carbachol (CCh), or neither (basal) was added. The tubes were reaerated with 95% O<sub>2</sub>/5% CO<sub>2</sub>, recapped, and reincubated for 0, 15, 30, 45, and 60 min. The reaction was stopped with 940  $\mu$ l chloroform:methanol (1:2 v/v). Chloroform and water were then added (310  $\mu$ l

each) and the phases were separated by centrifugation with 90g for 5 min. [<sup>3</sup>H]IP<sub>1</sub> was separated from [<sup>3</sup>H]myo-inositol in the water phase by column chromatography using Dowex AG 1-X8 resin (Bio Rad, Richmond, CA) in the formate form. The “n” refers to the number of experiments and one experiment includes the mean value of duplicate results. The [<sup>3</sup>H]IP<sub>1</sub> formed in the tracheal slices was counted with a liquid scintillation counter and presented by disintegration per minute (DPM). The counts in DPM of two samples were averaged and the average DPMs of the blank values (no slices present) were subtracted to obtain the experimental data.

#### The Effect of Hypocapnia on Monophosphate Formation

The tracheal slices were taken out at time 0, washed, wiped, and put into new K-H solution, containing 0.5  $\mu$ Ci [<sup>3</sup>H]myo-inositol. The conditions of aeration and pH of solution were fourfold, *i.e.*, 95% O<sub>2</sub>/5% CO<sub>2</sub> (pH 7.48), 97.5% O<sub>2</sub>/2.5% CO<sub>2</sub> (pH 7.84), 100% O<sub>2</sub> (pH 8.37), or 95% O<sub>2</sub>/5% CO<sub>2</sub> (pH 8.37 titrated with NaOH) (table 1). The pH and partial pressure of CO<sub>2</sub> and O<sub>2</sub> were assayed with an ABL Acid Base Analyzer (Radiometer, Copenhagen, Denmark). The reaction was started by adding NE, CCh, or neither 15 min after putting into the new K-H solution. The tubes (300  $\mu$ l incubation volume) were reaerated, recapped, and reincubated for an additional 45 min. The reaction was stopped with 940  $\mu$ l chloroform:methanol (1:2 v/v), followed by the same procedure described above.

#### Statistical Analysis

Data were expressed as mean  $\pm$  SE. The results of repeated measures and multiple groups were analyzed by one-way ANOVA. Multiple pairwise comparisons between groups were assessed by Scheffe's test. A comparison between two groups was assessed by Student's *t* test. A *P* value < 0.05 was considered significant.

Table 1. Gas Analysis of the Solution of Normocapnia, Moderate Hypocapnia, and Severe Hypocapnia

|                                       | Normocapnia     | Moderate Hypocapnia | Severe Hypocapnia |
|---------------------------------------|-----------------|---------------------|-------------------|
| pH                                    | 7.48 $\pm$ 0.10 | 7.84 $\pm$ 0.08     | 8.37 $\pm$ 0.02   |
| P <sub>CO<sub>2</sub></sub><br>(mmHg) | 36 $\pm$ 3      | 19 $\pm$ 2          | 5 $\pm$ 2         |
| P <sub>O<sub>2</sub></sub><br>(mmHg)  | 535 $\pm$ 53    | 512 $\pm$ 43        | 552 $\pm$ 65      |

Values are mean  $\pm$  SE; n = 4 for each value.



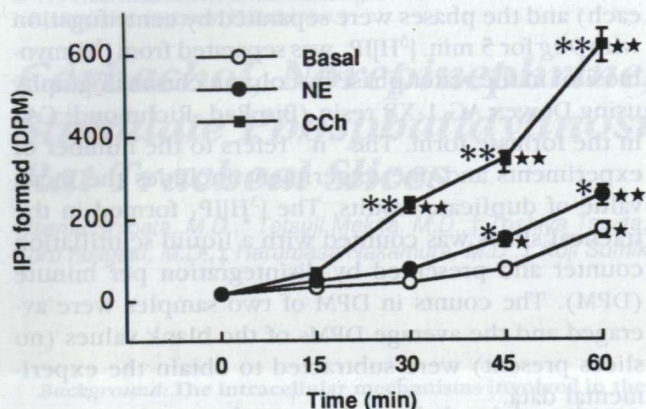

Fig. 1. Time course of IP<sub>1</sub> formation by 2.5  $\mu$ M norepinephrine (NE), 5.5  $\mu$ M carbachol (CCh), or neither (Basal) under normocapnia in rat tracheal slices (mean  $\pm$  SE;  $n = 6-9$  for each value). \* $P < 0.05$  versus time 0. \*\* $P < 0.01$  versus time 0. \* $P < 0.05$  versus basal. \*\* $P < 0.01$  versus basal.

## Results

Time course of IP<sub>1</sub> formation after adding NE (2.5  $\mu$ M), CCh (5.5  $\mu$ M), or neither (basal) are shown in figure 1. Basal IP<sub>1</sub> formation reached a level of  $168 \pm 12$  DPM after 60 min and, in the presence of NE or CCh, IP<sub>1</sub> formed was  $252 \pm 23$  DPM and  $615 \pm 39$  DPM, respectively. The effects of hypocapnia on IP<sub>1</sub> formation were shown in figures 2 and 3. Basal IP<sub>1</sub> formation was  $150 \pm 8$  DPM under normocapnia and  $245 \pm 18$  DPM under severe hypocapnia, respectively, and there was a significant difference between normocapnia

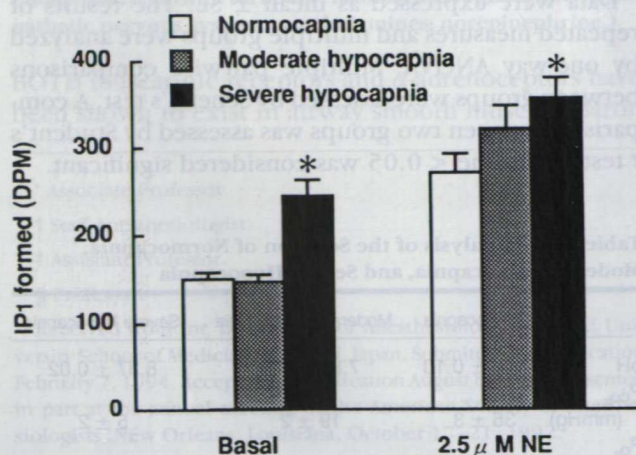

Fig. 2. The effects of hypocapnia on basal and norepinephrine (NE)-induced IP<sub>1</sub> formation in rat tracheal slices (mean  $\pm$  SE;  $n = 7-11$ ). \* $P < 0.05$  versus normocapnia.

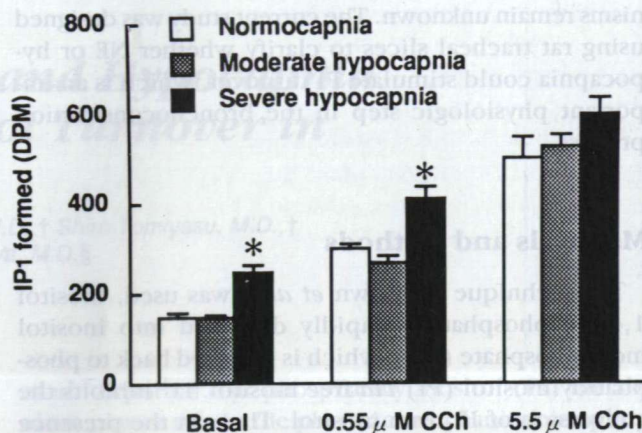

Fig. 3. The effects of hypocapnia on basal, carbachol (CCh)-induced IP<sub>1</sub> formation in rat tracheal slices (mean  $\pm$  SE;  $n = 7-11$ ). \* $P < 0.05$  versus normocapnia.

and severe hypocapnia. Monophosphate formed in the presence of 2.5  $\mu$ M NE was  $272 \pm 21$  DPM under normocapnia and  $356 \pm 23$  DPM under severe hypocapnia, respectively, and there was a significant difference between normocapnia and severe hypocapnia. Monophosphate formed in the presence of 0.55  $\mu$ M CCh was  $300 \pm 10$  DPM under normocapnia and  $412 \pm 25$  DPM under severe hypocapnia, respectively, and there was a significant difference between them. Monophosphate formed in the presence of 5.5  $\mu$ M CCh was not significantly different between normocapnia and hypocapnia. As shown in figure 4, removal of the epithelium did not influence basal IP<sub>1</sub> formation under either normocapnia or hypocapnia. Figure 5 shows roles of the

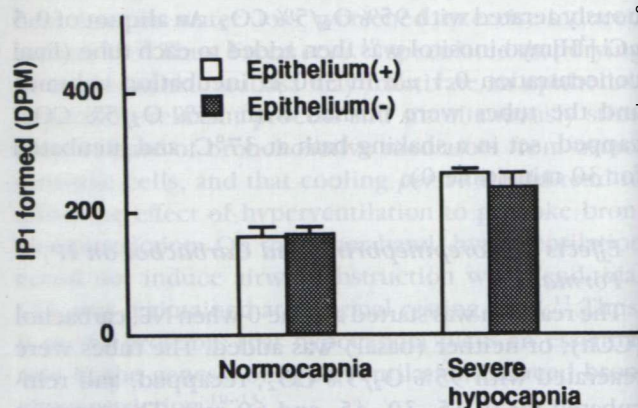

Fig. 4. Basal IP<sub>1</sub> formation under normocapnia and severe hypocapnia in the presence and absence of epithelium (mean  $\pm$  SE;  $n = 6$ ).



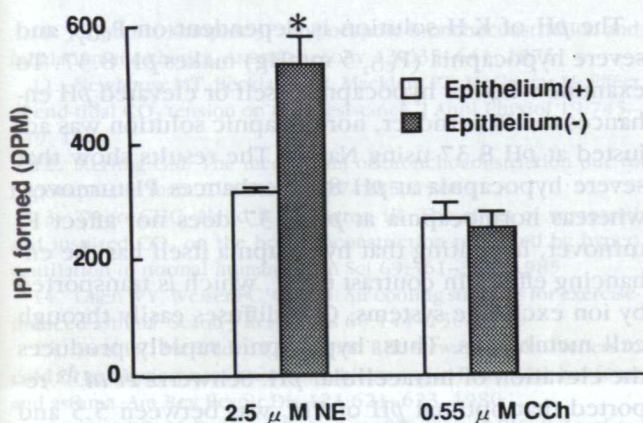

Fig. 5. Norepinephrine (NE)- and carbachol (CCh)-induced IP<sub>1</sub> formation in the presence and absence of epithelium (mean ± SE; n = 6). \**P* < 0.05 versus presence of epithelium.

epithelium in the IP<sub>1</sub> formation stimulated by NE or CCh. Monophosphate formation stimulated by NE was 315 ± 7 DPM in the presence of epithelium and 535 ± 48 DPM in the absence of epithelium. Thus, removal of the epithelium significantly enhanced NE-stimulated IP<sub>1</sub> formation. In contrast, IP<sub>1</sub> formation stimulated by CCh was not influenced by removal of the epithelium. The effects of pH and severe hypocapnia on basal IP<sub>1</sub> formation were shown in figure 6. The basal IP<sub>1</sub> formation was not influenced by an increase in extracellular pH under normocapnia, whereas it was enhanced by severe hypocapnia.

## Discussion

Histochemical analysis of human airways reveals a dense network of parasympathetic fibers.<sup>22</sup> Acetylcholine released from parasympathetic nerve terminals activates muscarinic receptors in airway smooth muscle cell membrane, and contracts airway smooth muscle. Carbachol was also shown to stimulate IP<sub>3</sub> formation in animal tracheal smooth muscle,<sup>3</sup> and the present results also show that CCh stimulates IP<sub>1</sub> formation. When muscarinic receptors are stimulated to activate the phospholipase C (PLC), phosphatidylinositol-4,5-bisphosphate (PIP<sub>2</sub>) is hydrolyzed into IP<sub>3</sub> and diacylglycerol. Inositol 1,4,5-triphosphate mobilizes Ca<sup>++</sup> from sarcoplasmic reticulum,<sup>23</sup> whereas diacylglycerol activates protein kinase C (PKC), which may also be a mechanism of modulating or controlling smooth muscle tension.<sup>24</sup> Subsequently, the increase in cytoplasmic

Ca<sup>++</sup> concentration and activation of PKC may cause smooth muscle contraction.

Park and Rasmussen<sup>25,26</sup> have reported that the contractile response of tracheal smooth muscle strips to CCh stimulation reaches the plateau within 2–3 min and is sustained with no loss of tension after many hours of incubation with the agonist. Giembycz and Rodgers<sup>27</sup> have provided evidence that a rapid, short-lived increase in IP<sub>3</sub> induced by CCh stimulation precedes the development of tension. Phosphatidylinositol-4,5-bisphosphate, precursor of IP<sub>3</sub>, formation decreases rapidly and remained at this new steady state level in the continued presence of CCh,<sup>28</sup> indicating that IP<sub>3</sub> production is sustained even after a rapid, short-lived increase. Thus, IP<sub>3</sub> would have an important role for initiating and maintaining contraction of airway smooth muscle. In the current study, we measured the tissue content of IP<sub>1</sub> as an index of IP<sub>3</sub> generation, because IP<sub>3</sub> is rapidly degraded into IP<sub>1</sub> and the tissue content of IP<sub>1</sub> increases in a linear manner over 60 min in the presence of CCh.<sup>29</sup> Wills-Karp<sup>30</sup> observed both the contraction and the PI response in tracheal tissues of guinea pigs and found that IP<sub>1</sub> accumulation incubated for 30 min with CCh between 1 μM and 1 mM is between 150 and 250% of basal. Our results show that IP<sub>1</sub> accumulation for 60 min with 5.5 μM CCh is 370% of basal. The magnitude of IP<sub>1</sub> accumulation in our study is consistent with their values. Thus, this magnitude of the PI response would be enough to cause the physiologic effect.

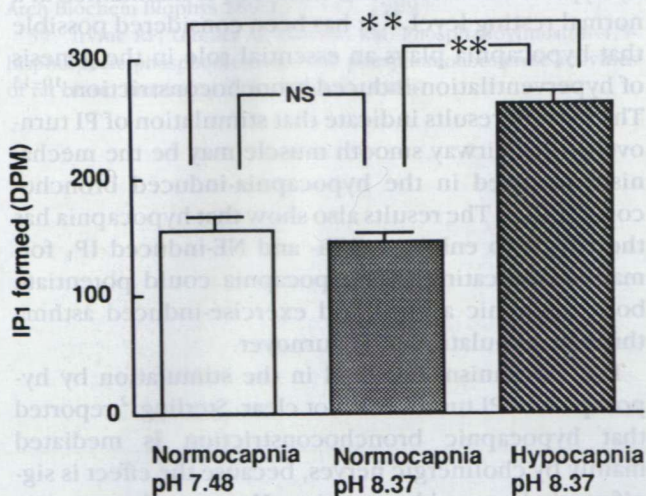

Fig. 6. Effects of severe hypocapnia (P<sub>CO</sub><sub>2</sub> 5 mmHg) and metabolic alkalosis (pH 8.37) on basal IP<sub>1</sub> formation in rat tracheal slices (mean ± SE; n = 6). \*\**P* < 0.01. NS = not significant.



$\alpha$ -Adrenoceptors also have been shown to exist in rat airways by autoradiographic analysis.<sup>1</sup> Catecholamine administration after  $\beta$ -receptor blockade induces asthma in normal subjects, as well as in patients with asthma.<sup>31</sup> Although inhalation of prazosin, a specific  $\alpha_1$ -adrenergic antagonist, had little effect on resting airway tone in asthmatics, it partially inhibited exercise-induced asthma in asthmatic subjects.<sup>32,33</sup> Barnes *et al.* demonstrated that the plasma concentration of NE increases in normal and asthmatic subjects during exercise<sup>9</sup> and it is considered probable that NE released during exercise would play a significant role in causing exercise-induced asthma. The current results indicate that the stimulation of PI turnover through  $\alpha_1$ -adrenoceptor activation would be the mechanism involved in the NE-induced bronchoconstriction during exercise. We have also examined the roles of epithelium in the NE- or CCh-induced PI turnover. The results show that NE-induced PI turnover is enhanced in the absence of epithelium, whereas CCh-induced PI turnover is not influenced. Farmer *et al.*<sup>34</sup> reported that epithelium removal enhances the sensitivity of guinea-pig isolated trachea to the bronchodilator, isoproterenol, and they have indicated that airway epithelium would play a significant role in the uptake and metabolism of catecholamines. Our results would also support this mechanism, and indicate that exercise-induced asthma may occur easily in patients who have the airway epithelium damaged by inflammation.

Airway smooth muscle contraction cannot be induced by hyperventilation if end-tidal  $\text{CO}_2$  is maintained at a normal resting level.<sup>11</sup> It has been considered possible that hypocapnia plays an essential role in the genesis of hyperventilation-induced bronchoconstriction.<sup>10-13</sup> The current results indicate that stimulation of PI turnover in the airway smooth muscle may be the mechanism involved in the hypocapnia-induced bronchoconstriction. The results also show that hypocapnia has the effects to enhance CCh- and NE-induced  $\text{IP}_1$  formation, indicating that hypocapnia could potentiate both vagotonic asthma and exercise-induced asthma through stimulation of PI turnover.

The mechanism involved in the stimulation by hypocapnia of PI turnover is not clear. Sterling<sup>12</sup> reported that hypocapnic bronchoconstriction is mediated mainly by cholinergic nerves, because the effect is significantly lessened by atropine. However, hypocapnia ( $\text{P}_{\text{CO}_2}$  less than 14 mmHg) causes bronchoconstriction that cannot be prevented by atropine.<sup>35</sup>

The pH of K-H solution is dependent on  $\text{P}_{\text{CO}_2}$ , and severe hypocapnia ( $\text{P}_{\text{CO}_2}$  5 mmHg) makes pH 8.37. To examine whether hypocapnia itself or elevated pH enhances the PI turnover, normocapnic solution was adjusted at pH 8.37 using NaOH. The results show that severe hypocapnia at pH 8.37 enhances PI turnover, whereas normocapnia at pH 8.37 does not affect PI turnover, indicating that hypocapnia itself has the enhancing effect. In contrast to  $\text{H}^+$ , which is transported by ion exchange systems,  $\text{CO}_2$  diffuses easily through cell membranes. Thus, hypocapnia rapidly produces the elevation of intracellular pH. Schwartz *et al.*<sup>36</sup> reported that optimal pH of PLC was between 5.5 and 6.8, whereas Irvine *et al.*<sup>37</sup> observed that optimal pH was 5.5–6.8 and 7.5–8.0. Therefore, hypocapnia may activate PLC, and may stimulate PI turnover by increasing intracellular pH to 7.5–8.0.

In conclusion, CCh, NE, and hypocapnia stimulate PI turnover in the airway smooth muscle, which causes bronchoconstriction. Hypocapnia also augments NE- and CCh-induced PI turnover, which may cause worsening of exercise-induced asthma and vagotonic asthma, respectively.

## References

1. Barnes PJ, Basbaum CB, Nadel JA: Autoradiographic localization of autonomic receptors in airway smooth muscle. *Am Rev Respir Dis* 127:758–762, 1983
2. Baron CB, Cunningham M, Strauss JF III, Coburn RF: Pharmacomechanical coupling in smooth muscle may involve phosphatidylinositol metabolism. *Proc Natl Acad Sci U S A* 81:6899–6903, 1984
3. Hashimoto T, Hirata M, Ito Y: A role for inositol 1,4,5-trisphosphate in initiation of agonist-induced contractions of dog tracheal smooth muscle. *Br J Pharmacol* 86:191–199, 1985
4. Meurs H, Roffel AF, Postema JB, Timmermans A: Evidence for a direct relationship between phosphoinositide metabolism and airway smooth muscle contraction induced by muscarinic agonists. *Eur J Pharmacol* 156:271–274, 1988
5. Mukherjee A, Wasserman MA: Role of alpha-adrenergic receptors in cartilaginous and non-cartilaginous human airways. *Methods Fin Exp Clin Pharmacol* 8:667–674, 1986
6. Mathe AA, Astrom A, Person N-A: Some bronchoconstricting and bronchodilating responses of human isolated bronchi: Evidence for the existence of alpha-adrenoceptors. *J Pharm Pharmacol* 23:905–910, 1971
7. Adolphson RL, Abern SB, Townley RG: Human and guinea pig respiratory muscle. *J Allergy* 47:110–111, 1971
8. Beil M, Dekock A: Role of alpha-adrenergic receptors in exercise-induced bronchoconstriction. *Respiration* 35:78–86, 1978
9. Barnes PJ, Brown MJ, Silverman M, Dollery CT: Circulating catecholamines in exercise and hyperventilation-induced asthma. *Thorax* 36:435–440, 1981



## NE AND HYPOCAPNIA STIMULATE PI TURNOVER

10. Coon RL, Kampine JP: Hypocapnic bronchoconstriction and inhalation anesthetics. *ANESTHESIOLOGY* 43:635-641, 1975
11. Newhouse MT, Becklake MR, Macklem PT, McGregor M: Effect of end-tidal CO<sub>2</sub> tension on flow resistance. *J Appl Physiol* 19:745-749, 1964
12. Sterling GM: The mechanism of bronchoconstriction due to hypocapnia in man. *Clin Sci* 34:277-285, 1968
13. Twort CHC, Neild JE, Cameron IR: The effect of verapamil and inspired CO<sub>2</sub> on the bronchoconstriction provoked by hyperventilation in normal humans. *Clin Sci* 69:361-364, 1985
14. Chen WY, Weiser PC, Chai H: Air cooling stimulus for exercise-induced asthma. *Scand J Respir Dis* 60:144-150, 1979
15. Deal EC, McFadden ER, Ingram RH: Airway responsiveness to cold air and hyperpnea in normal subjects and in those with hay fever and asthma. *Am Rev Respir Dis* 121:621-623, 1980
16. Deal EC, McFadden ER, Ingram RH, Strauss RH: Role of respiratory heat exchange in production of exercise-induced asthma. *J Appl Physiol* 46:467-475, 1979
17. Farly RD, Albazzaz MK, Patel KR: Role of cooling and drying in hyperventilation induced asthma. *Thorax* 43:289-274, 1988
18. Sheppard D, Eschenbacher WL: Respiratory water loss as a stimulus to exercise-induced bronchoconstriction. *J Allergy Clin Immunol* 73:640-642, 1984
19. Freed AN, Hirshman CA: Airflow-induced bronchoconstriction: A model of airway reactivity in humans. *ANESTHESIOLOGY* 69:923-932, 1988
20. Brown E, Kendall DA, Nahorski SR: Inositol phospholipid hydrolysis in rat cerebral cortical slices: I. Receptor characterization. *J Neurochem* 42:1379-1387, 1984
21. Berridge MJ, Downes CP, Hanley MR: Lithium amplifies agonist dependent phosphatidylinositol responses in brain and salivary glands. *Biochem J* 206:587-595, 1982
22. Mann SP: The innervation of mammalian bronchial smooth muscle: The localization of catecholamines and cholinesterases. *Histochem J* 3:319-331, 1971
23. Berridge MJ: Rapid accumulation of inositol trisphosphate reveals that agonists hydrolyse polyphosphoinositides instead of phosphatidylinositol. *Biochem J* 212:849-858, 1983
24. Baron CB, Pring M, Coburn RF: Inositol lipid turnover and compartmentation in canine trachealis smooth muscle. *Am J Physiol* 256:C375-C383, 1989
25. Park S, Rasmussen H: Activation of tracheal smooth muscle contraction: Synergism between Ca<sup>2+</sup> and activators of protein kinase C. *Proc Natl Acad Sci USA* 82:8835-8839, 1985
26. Park S, Rasmussen H: Carbachol-induced protein phosphorylation changes in bovine tracheal smooth muscle. *J Biol Chem* 261:15734-15739, 1986
27. Gienbycz MA, Rodgers IW: Electrophysiological and other aspects of excitation-contraction coupling and uncoupling in mammalian smooth muscle. *Life Sci* 41:111-132, 1987
28. Chilvers ER, Batty IH, Challiss RAJ, Barnes PJ, Nahorski SR: Determination of mass changes in phosphatidylinositol 4,5-bisphosphate and evidence for agonist-stimulated metabolism of inositol 1,4,5-trisphosphate in airway smooth muscle. *Biochem J* 275:373-379, 1991
29. Chilvers ER, Barnes PJ, Nahorski SR: Characterization of agonist-stimulated incorporation of myo-[<sup>3</sup>H]inositol into inositol phospholipids and [<sup>3</sup>H]inositol phosphate formation in tracheal smooth muscle. *Biochem J* 262:739-746, 1989
30. Wills-Karp M: Effects of age on muscarinic agonist-induced contraction and IP accumulation in airway smooth muscle. *Life Sci* 49:1039-1045, 1991
31. Simonsson BG, Svedmyr N, Skoogh BE: In vivo and in vitro studies on alpha-receptors in human airways: Potentiation with bacterial endotoxin. *Scand J Respir Dis* 53:227-231, 1972
32. Barnes PJ, Wilson NM, Vickers H: Prazosin, an alpha-adrenoceptor antagonist, partially inhibits exercise-induced asthma. *J Allergy Clin Immunol* 68:411-415, 1981
33. Bianco S, Griffin JP, Kamburoff PH: Prevention of exercise-induced asthma by indoramin. *Br Med J* 4:18-20, 1974
34. Farmer SG, Fedan JS, Hay DWP, Raeburn D: The effects of epithelium removal on sensitivity of guinea-pig isolated trachealis to bronchodilator drugs. *Br J Pharmacol* 89:407-414, 1986
35. Severinghaus JW, Swenson EW, Finley TN, Lategola MT: Unilateral hypoventilation produced in dogs by occluding one pulmonary artery. *J Appl Physiol* 16:53-60, 1961
36. Schwartz DW, Halverson J: Characterization of phospholipase C-mediated polyphosphoinositide hydrolysis in rat heart ventricles. *Arch Biochem Biophys* 269:137-147, 1989
37. Irvine RF, Letcher AJ, Dawson RM: Phosphatidylinositol-4,5-bisphosphate phosphodiesterase and phosphomonoesterase activities of rat brain. *Biochem J* 218:177-185, 1984
